# Supplementary material for: SMC4, which is essentially involved in lung development, is associated with lung adenocarcinoma progression
Source: PubMed Central journal article supplement (PMC5043270; doi:10.1038/srep34508), 2016-09-30
Supplement: srep34508-s1.pdf [file srep34508-s1.pdf]

**Title:** SMC4, which is essentially involved in lung development, is associated with lung adenocarcinoma progression

**Authors:** Chengli Zhang<sup>#</sup>, Manchao Kuang<sup>#</sup>, Meng Li, Lin Feng<sup>\*</sup>, Kaitai Zhang<sup>\*</sup> & Shujun Cheng<sup>\*</sup>

**Supplementary Figure S1. Scattergram of node degrees in the co-expression network.** The co-expression network was scale-free.

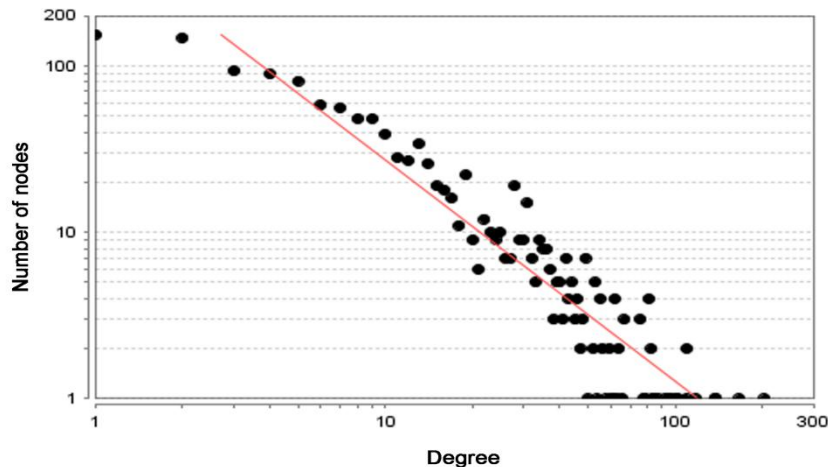

**Supplementary Figure S2. SMC4 participates in multiple aspects of lung development and tumorigenesis.** (a-d) Representative GO CC and KEGG terms of the genes significantly correlated with SMC4 in lung ADC. (e-h) Representative GO CC and KEGG terms of the genes significantly correlated with SMC4 in lung development. Positively correlated terms were labeled in red, while negatively correlated terms were labeled in blue.

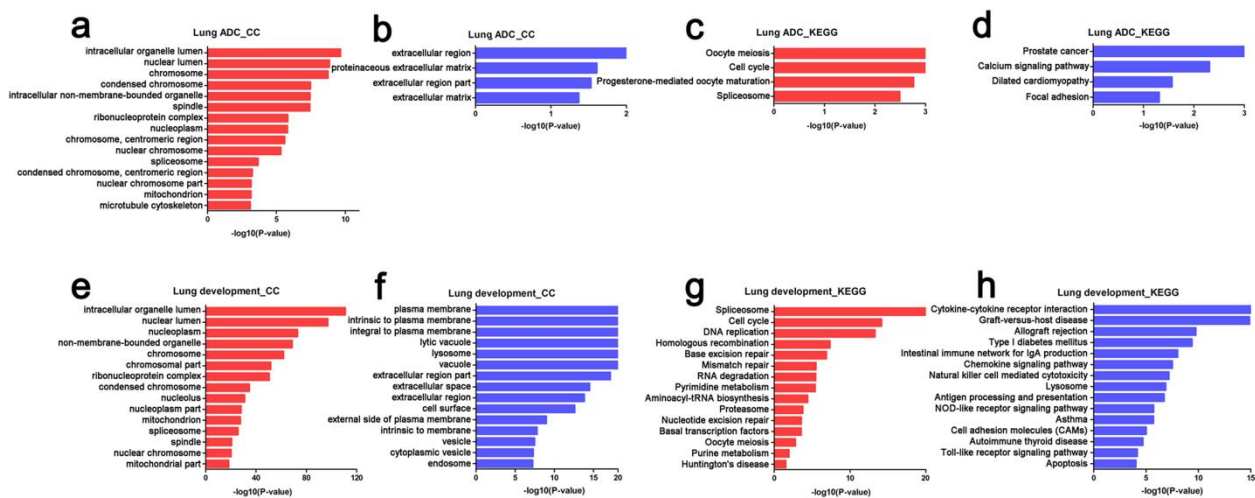

**Supplementary Table.S1****GO enrichment analysis of the 18 genes in the SMC4 associated module according to biological process**

| <b>GO accession</b> | <b>GO term</b>           | <b>FDR</b> |
|---------------------|--------------------------|------------|
| GO:0000278          | Mitotic cell cycle       | 2.52E-16   |
| GO:0051301          | Cell division            | 1.57E-15   |
| GO:0007049          | Cell cycle               | 1.44E-13   |
| GO:0007067          | Mitosis                  | 5.88E-13   |
| GO:0000280          | Nuclear division         | 5.88E-13   |
| GO:0000075          | Cell cycle checkpoint    | 0.0071     |
| GO:0006260          | DNA replication          | 0.1273     |
| GO:0006323          | DNA packaging            | 0.5198     |
| GO:0031570          | DNA integrity checkpoint | 2.7985     |
| GO:0051276          | Chromosome organization  | 4.0789     |
